# Supplementary material for: New europium coordination polymers with efficient energy transfer from conjugated tetracarboxylate ligands to Eu3+ ion: syntheses, structures, luminescence and magnetic properties
Source: Royal Society of Chemistry journal article supplement (doi:10.1039/c1dt10693g), 2011-01-01
Supplement: c1dt10693g.pdf [file c1dt10693g.pdf]

*Supporting Information for*

**Europium Coordination Polymers Based on two conjugated  
tetracarboxylates: Syntheses, Structures, Luminescence and  
Magnetic Properties**

Li-Feng Wang,<sup>a,b</sup> Ling-Chen Kang,<sup>a</sup> Wen-Wei Zhang,<sup>\*a</sup> Fang-Ming  
Wang,<sup>a</sup> Xiao-Ming Ren<sup>\*b</sup> and Qing-Jin Meng<sup>a</sup>

<sup>a</sup> *State Key Laboratory of Coordination Chemistry, School of Chemistry and Chemical Engineering, Nanjing University, Nanjing 210093. E-mail: wwzhang@nju.edu.cn*

<sup>b</sup> *Department of Applied Chemistry, College of Science, Nanjing University of Technology, Nanjing 210009. E-mail: xmren@njut.edu.cn*

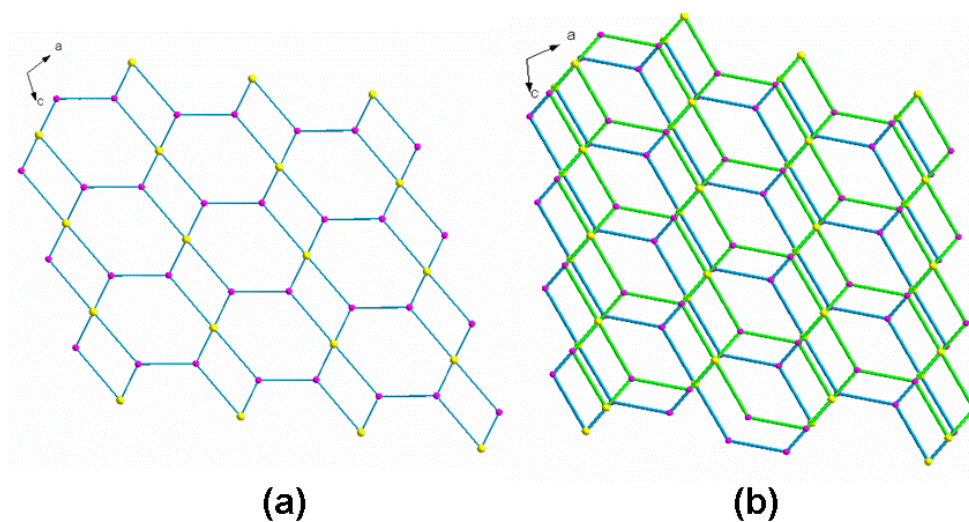

**Fig. S1** Schematic diagram of the extended net with 2D (3,4) topology in complex **1** viewed along the *b* direction: (a) one layer; (b) two adjacent layers (pink: the center of the binuclear unit; orange: the center of the aryl rings).

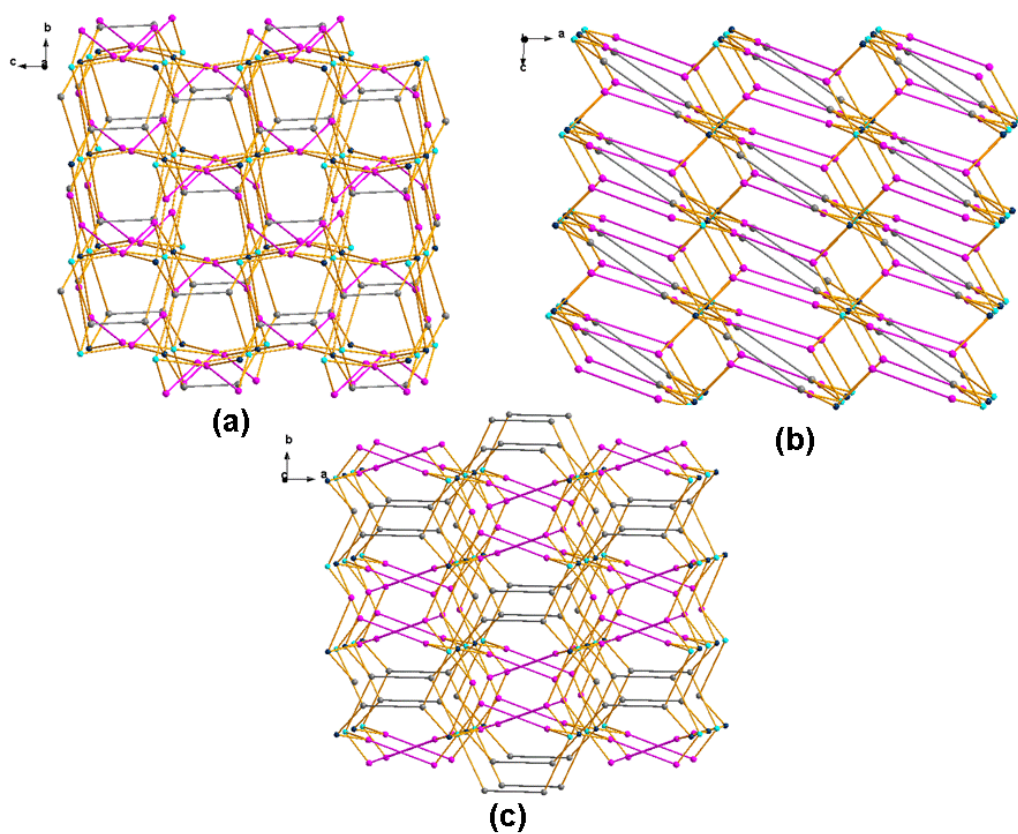

**Fig. S2** Schematic diagram of the stacking net with 3D (3,6) topology in complex **2** along the direction of *a* (a), *b* (b), and *c* (c) (dark teal: the center of  $\text{Eu}_2(\text{CO}_2)_4$  (**A**) subunits; turquoise: the center of  $\text{Eu}_2(\text{CO}_2)_2$  (**B**) subunit; gray: the center of the  $\text{BBTC}^{4-}(\alpha)$  aryl rings; pink: the center of the  $\text{BBTC}^{4-}(\beta)$  aryl rings).

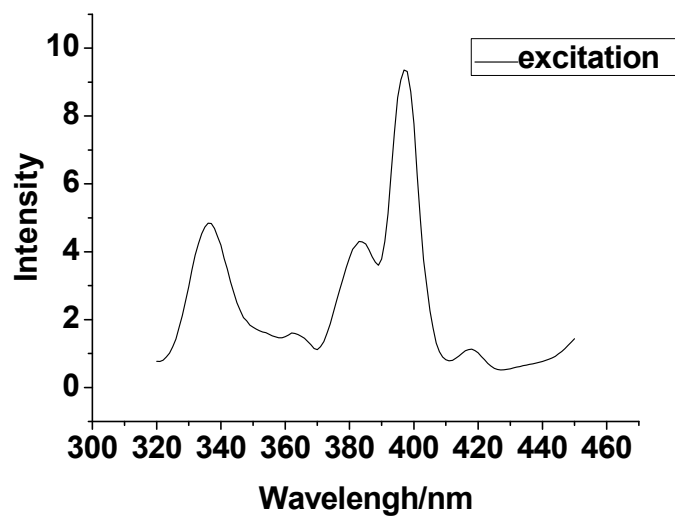

(a)

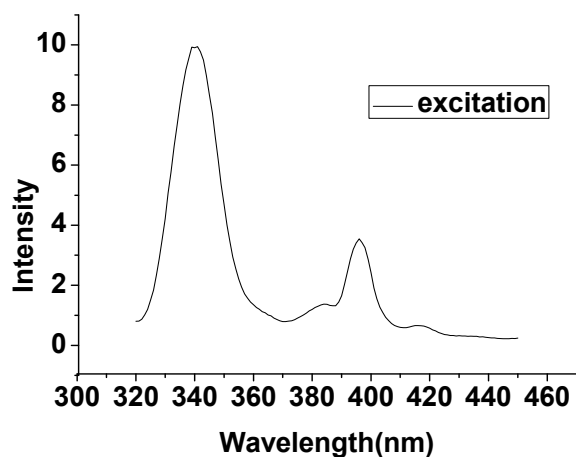

(b)

**Fig. S3** Room-temperature excitation spectra for complex **1** (a) and **2** (b) in solid state.

Complex **1** exhibits excitation bands at 336, 383, 397 and 417 nm, while **2** shows excitation bands at 340 and 397 nm. When excited at 397 nm for **1** and 340 nm for **2**, both of them show characteristic luminescence.

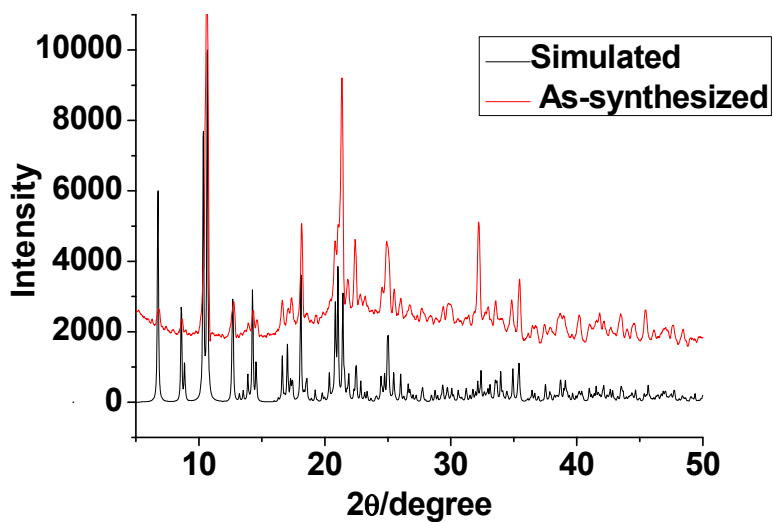

(a)

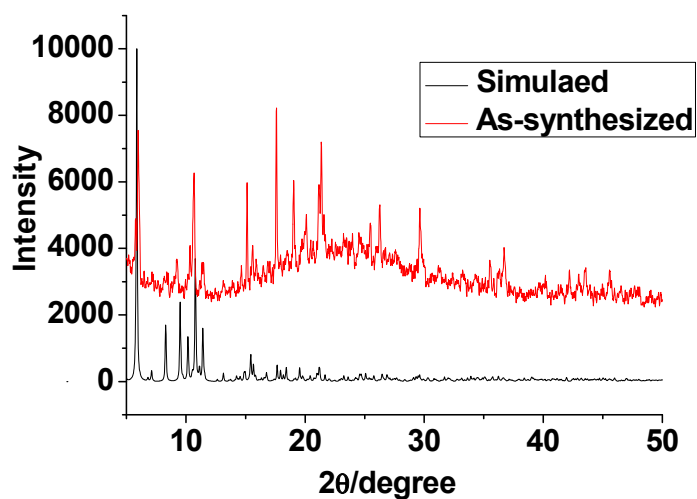

(b)

Fig. S4 PXRD patterns of compound **1** (a) and **2** (b).

The purities of complexes **1** and **2** are confirmed by X-ray power diffraction analyses. The experimental and stimulated powder X-ray diffraction (PXRD) patterns are consistent with each other to indicate the good purity of the samples.

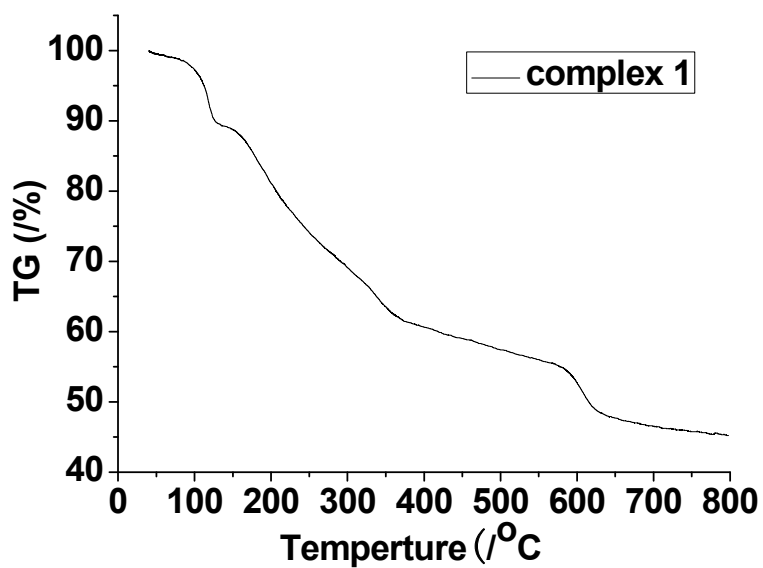

(a)

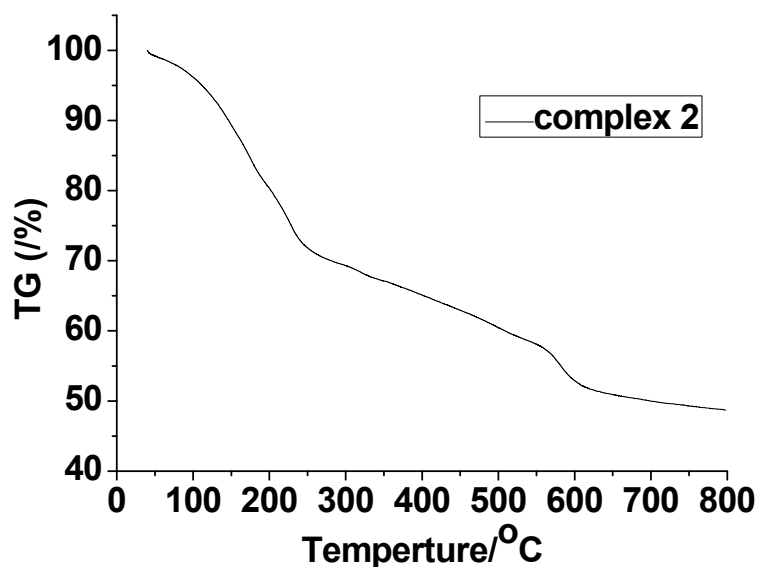

(b)

Fig. S5 TG curves of compound **1** (a) and **2** (b).

Thermal gravimetric analysis (TGA) was conducted to determine the thermal stabilities of **1** and **2** which is an important aspect for metal-organic frameworks. As shown in Fig. S5, **1** and **2** exhibit several sequential weight loss steps, corresponding to the delibration of guest molecules and coordinated solvents. Above 470 °C for **1** and 520 °C for **2**, the frameworks start to decompose.

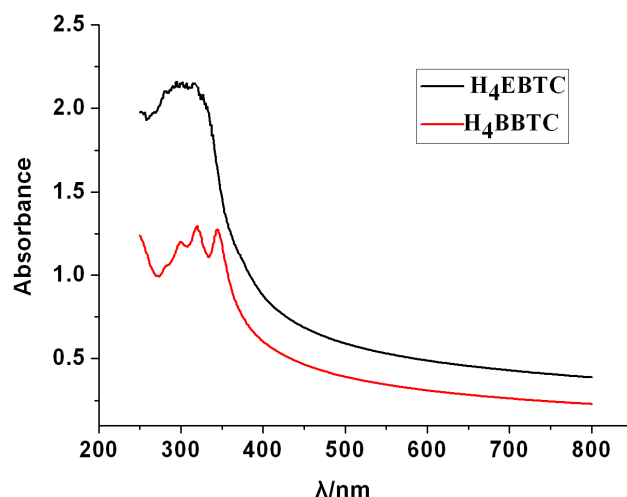

Fig. S6 UV-vis spectra of H<sub>4</sub>EBTC (black) and H<sub>4</sub>BBTC (red).

Table S1. Selected bond distances (Å) and angles(°) for **1**

**Bond distances/ Å**

|         |          |         |          |
|---------|----------|---------|----------|
| Eu1–O2  | 2.336(6) | Eu1–O5  | 2.345(5) |
| Eu1–O7  | 2.477(6) | Eu1–O8  | 2.442(6) |
| Eu1–O9  | 2.530(8) | Eu1–O10 | 2.519(7) |
| Eu1–O12 | 2.534(8) | Eu1–O13 | 2.507(8) |
| Eu1–O15 | 2.351(8) | Eu2–O1  | 2.303(6) |
| Eu2–O3  | 2.465(6) | Eu2–O4  | 2.436(6) |
| Eu2–O6  | 2.338(6) | Eu2–O16 | 2.360(7) |
| Eu2–O17 | 2.434(8) | Eu2–O18 | 2.455(7) |
| Eu2–O19 | 2.381(7) |         |          |

**Bond angles/ °**

|             |          |             |          |
|-------------|----------|-------------|----------|
| O2–Eu1–O5   | 82.6(2)  | O2–Eu1–O15  | 79.2(3)  |
| O5–Eu1–O15  | 78.3(2)  | O2–Eu1–O8   | 127.4(2) |
| O5–Eu1–O8   | 148.4(2) | O15–Eu1–O8  | 96.0(3)  |
| O2–Eu1–O7   | 75.6(2)  | O5–Eu1–O7   | 150.7(2) |
| O15–Eu1–O7  | 78.7(3)  | O8–Eu1–O7   | 52.4(2)  |
| O2–Eu1–O13  | 79.9(2)  | O5–Eu1–O13  | 72.1(2)  |
| O15–Eu1–O13 | 145.6(3) | O8–Eu1–O13  | 118.4(2) |
| O7–Eu1–O13  | 121.6(3) | O2–Eu1–O10  | 151.0(2) |
| O5–Eu1–O10  | 86.0(2)  | O15–Eu1–O10 | 124.3(3) |
| O8–Eu1–O10  | 71.5(2)  | O7–Eu1–O10  | 122.2(2) |
| O13–Eu1–O10 | 71.2(3)  | O2–Eu1–O9   | 150.7(3) |
| O5–Eu1–O9   | 78.4(2)  | O15–Eu1–O9  | 75.2(3)  |
| O8–Eu1–O9   | 70.1(2)  | O7–Eu1–O9   | 112.7(2) |

|             |          |             |           |
|-------------|----------|-------------|-----------|
| O13–Eu1–O9  | 114.4(3) | O10–Eu1–O9  | 49.2(3)   |
| O2–Eu1–O12  | 82.8(3)  | O5–Eu1–O12  | 121.7(2)  |
| O15–Eu1–O12 | 151.0(3) | O8–Eu1–O12  | 77.2(3)   |
| O7–Eu1–O12  | 74.9(3)  | O13–Eu1–O12 | 49.8(3)   |
| O10–Eu1–O12 | 80.7(3)  | O9–Eu1–O12  | 126.3(3)  |
| O1–Eu2–O6   | 78.7(2)  | O1–Eu2–O16  | 90.1(2)   |
| O6–Eu2–O16  | 78.6(2)  | O1–Eu2–O19  | 107.8(3)  |
| O6–Eu2–O19  | 74.7(2)  | O16–Eu2–O19 | 143.9(2)  |
| O1–Eu2–O17  | 76.8(3)  | O6–Eu2–O17  | 143.5(3)  |
| O16–Eu2–O17 | 74.9(3)  | O19–Eu2–O17 | 138.8(3)  |
| O1–Eu2–O4   | 149.8(2) | O6–Eu2–O4   | 131.46(2) |
| O16–Eu2–O4  | 94.4(2)  | O19–Eu2–O4  | 85.6(2)   |
| O17–Eu2–O4  | 75.7(3)  | O1–Eu2–O18  | 81.3(2)   |
| O6–Eu2–O18  | 146.7(2) | O19–Eu2–O18 | 68.7(2)   |
| O17–Eu2–O18 | 71.8(3)  | O4–Eu2–O18  | 78.7(2)   |
| O1–Eu2–O3   | 154.7(2) | O6–Eu2–O3   | 79.30(2)  |
| O16–Eu2–O3  | 73.5(2)  | O19–Eu2–O3  | 77.9(2)   |
| O17–Eu2–O3  | 115.7(3) | O4–Eu2–O3   | 53.1(2)   |
| O18–Eu2–O3  | 122.8(2) |             |           |

**Table S2.** Selected bond distances (Å) and angles(°) for **2**

**Bond distances/ Å**

|           |          |           |           |
|-----------|----------|-----------|-----------|
| Eu(1)–O3  | 2.471(6) | Eu(1)–O4  | 2.507(6)  |
| Eu(1)–O5  | 2.396(7) | Eu(1)–O6  | 2.336(6)  |
| Eu(1)–O9  | 2.389(6) | Eu(1)–O10 | 2.322(6)  |
| Eu(1)–O13 | 2.440(8) | Eu(1)–O14 | 2.426(8)  |
| Eu(2)–O1  | 2.306(7) | Eu(2)–O2  | 2.300(9)  |
| Eu(2)–O7  | 2.532(6) | Eu(2)–O8  | 2.390(8)  |
| Eu(2)–O11 | 2.480(7) | Eu(2)–O12 | 2.384(7)  |
| Eu(2)–O15 | 2.355(9) | Eu(2)–O16 | 2.714(11) |

**Bond angles/°**

|            |          |            |          |
|------------|----------|------------|----------|
| O3–Eu1–O4  | 52.2(2)  | O5–Eu1–O3  | 77.2(2)  |
| O5–Eu1–O4  | 76.8(2)  | O5–Eu1–O13 | 144.1(3) |
| O5–Eu1–O14 | 136.0(3) | O6–Eu1–O3  | 144.0(2) |
| O6–Eu1–O4  | 150.6(2) | O6–Eu1–O5  | 124.8(2) |
| O6–Eu1–O9  | 78.2(2)  | O6–Eu1–O13 | 77.4(3)  |
| O6–Eu1–O14 | 78.9(3)  | O9–Eu1–O3  | 137.6(2) |
| O9–Eu1–O4  | 90.0(2)  | O9–Eu1–O5  | 75.8(3)  |
| O9–Eu1–O13 | 140.0(3) | O9–Eu1–O14 | 74.1(3)  |
| O10–Eu1–O3 | 82.0(2)  | O10–Eu1–O4 | 131.5(2) |



---

|             |          |             |          |
|-------------|----------|-------------|----------|
| O10–Eu1–O5  | 78.5(2)  | O10–Eu1–O6  | 76.3(6)  |
| O10–Eu1–O9  | 123.0(2) | O10–Eu1–O13 | 80.8(3)  |
| O10–Eu1–O14 | 145.4(3) | O13–Eu1–O3  | 71.1(3)  |
| O13–Eu1–O4  | 96.0(3)  | O14–Eu1–O3  | 105.5(3) |
| O14–Eu1–O4  | 71.9(3)  | O14–Eu1–O13 | 70.4(3)  |
| O1–Eu2–O7   | 77.3(2)  | O1–Eu2–O8   | 82.4(4)  |
| O1–Eu2–O12  | 149.8(3) | O1–Eu2–O15  | 79.3(3)  |
| O1–Eu2–O16  | 90.8(3)  | O2–Eu2–O1   | 93.6(3)  |
| O2–Eu2–O7   | 128.9(3) | O2–Eu2–O8   | 77.2(3)  |
| O2–Eu2–O11  | 77.4(3)  | O2–Eu2–O12  | 105.1(3) |
| O2–Eu2–O15  | 79.8(4)  | O2–Eu2–O16  | 158.4(3) |
| O7–Eu2–O16  | 72.7(3)  | O8–Eu2–O7   | 51.9(2)  |
| O8–Eu2–O11  | 113.1(3) | O8–Eu2–O16  | 124.4(3) |
| O11–Eu2–O7  | 122.9(3) | O11–Eu2–O16 | 91.2(3)  |
| O12–Eu2–O7  | 72.5(2)  | O12–Eu2–O8  | 79.0(3)  |
| O12–Eu2–O11 | 50.6(3)  | O12–Eu2–O16 | 80.5(3)  |
| O15–Eu2–O7  | 143.7(3) | O15–Eu2–O8  | 149.5(4) |
| O15–Eu2–O11 | 80.6(3)  | O15–Eu2–O12 | 126.7(3) |
| O15–Eu2–O16 | 80.3(4)  |             |          |

---
